# Supplementary material for: Abnormal Ribosome Biogenesis Partly Induced p53-Dependent Aortic Medial Smooth Muscle Cell Apoptosis and Oxidative Stress
Source: Hindawi journal article supplement (doi:10.1155/2019/7064319), 2019-05-09
Supplement: f1 [file 7064319.f1.pdf]

## **Supplementary Materials**

### **Fig.S1 PFT $\alpha$ inhibited superoxide production induced by cx-5461.**

HASMCs were pretreated with or without PFT $\alpha$  (10 $\mu$ M) for 12h, followed with treatment of cx-5461 (1 $\mu$ M) for 24h. The Dihydroethidium (DHE) staining was used to detect ROS production (red).

### **Fig.S2 Inhibition of RNA polymerase I by cx-5461 promoted the accumulation of ROS in mouse AD model.**

The 8-OHdG level in mouse aortic medial tissues was detected by performing immunofluorescence and the representative images were shown. Scale bar 200 $\mu$ m.

### **Fig.S3 Knockout of p53 decreased the ROS accumulation in mouse AD model.**

The 8-OHdG level in mouse aortic medial tissues was detected by performing immunofluorescence and the representative images were shown. Scale bar 200 $\mu$ m.

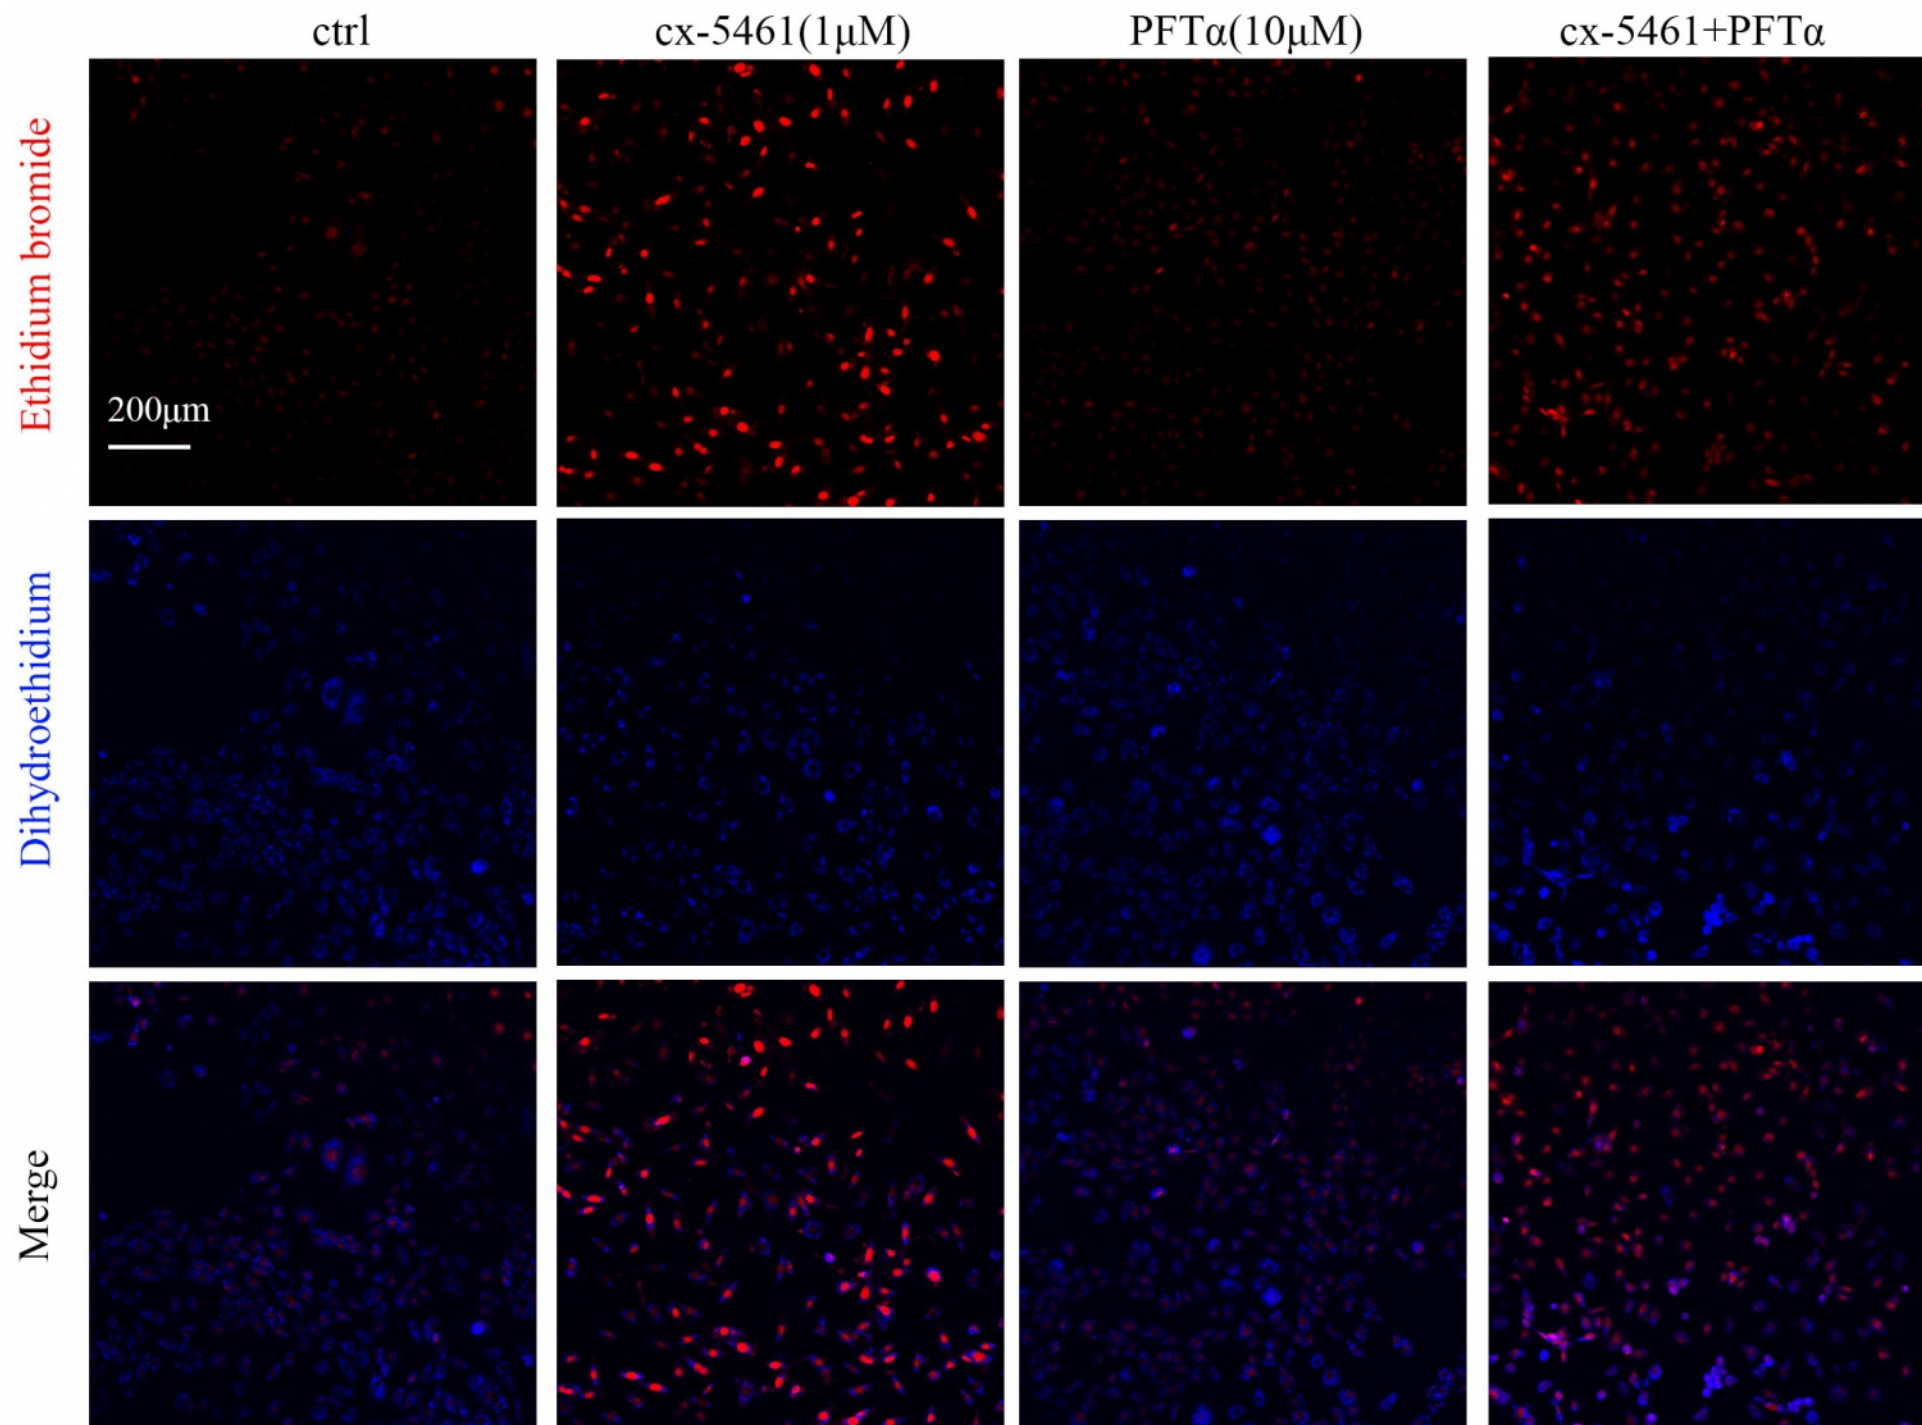

Figure S1

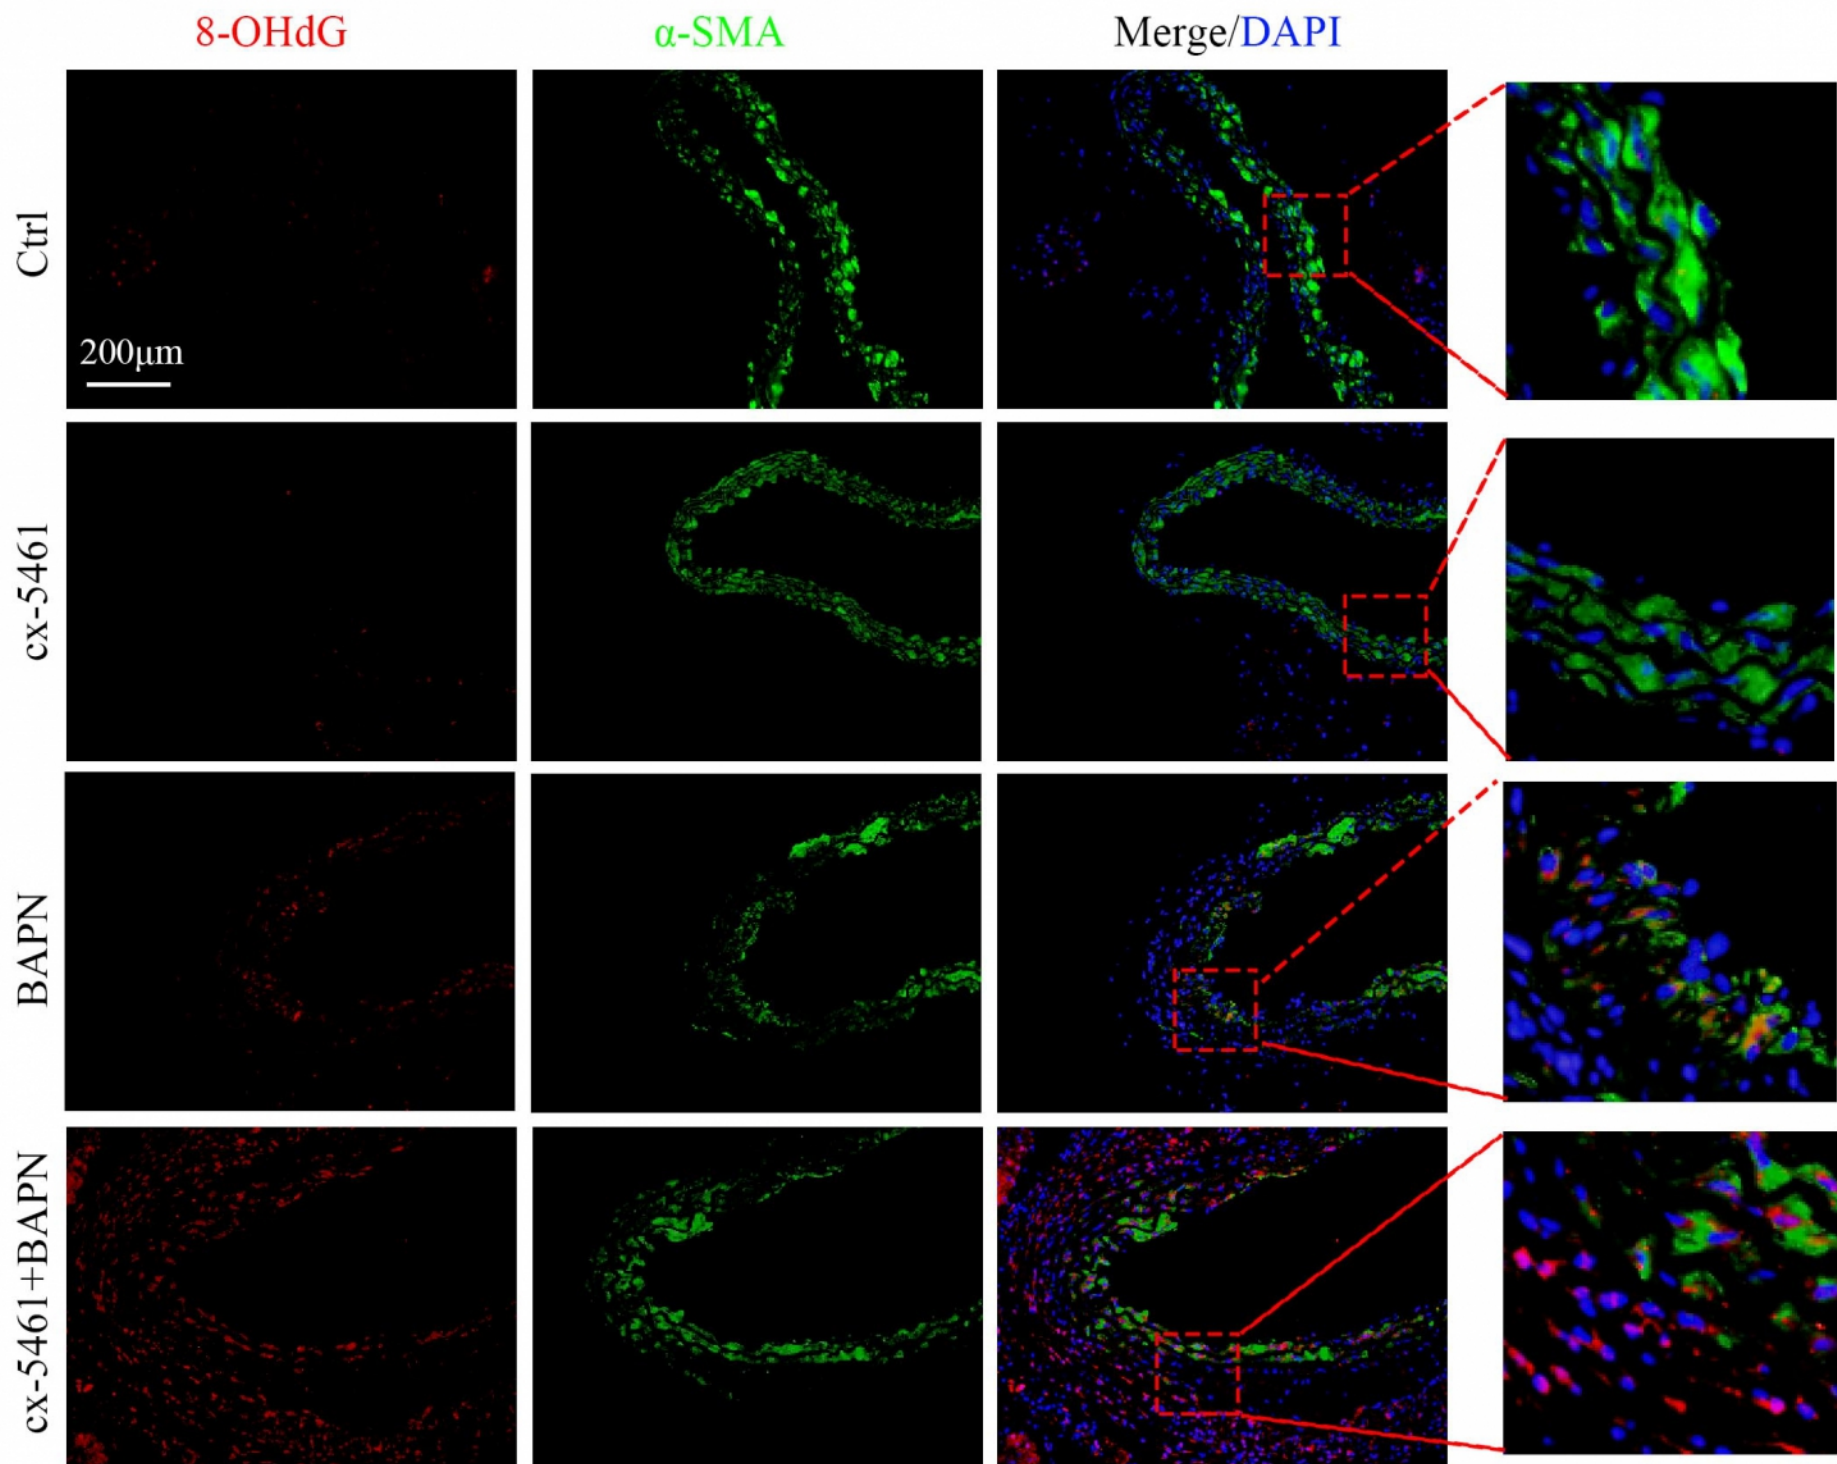

Figure S2

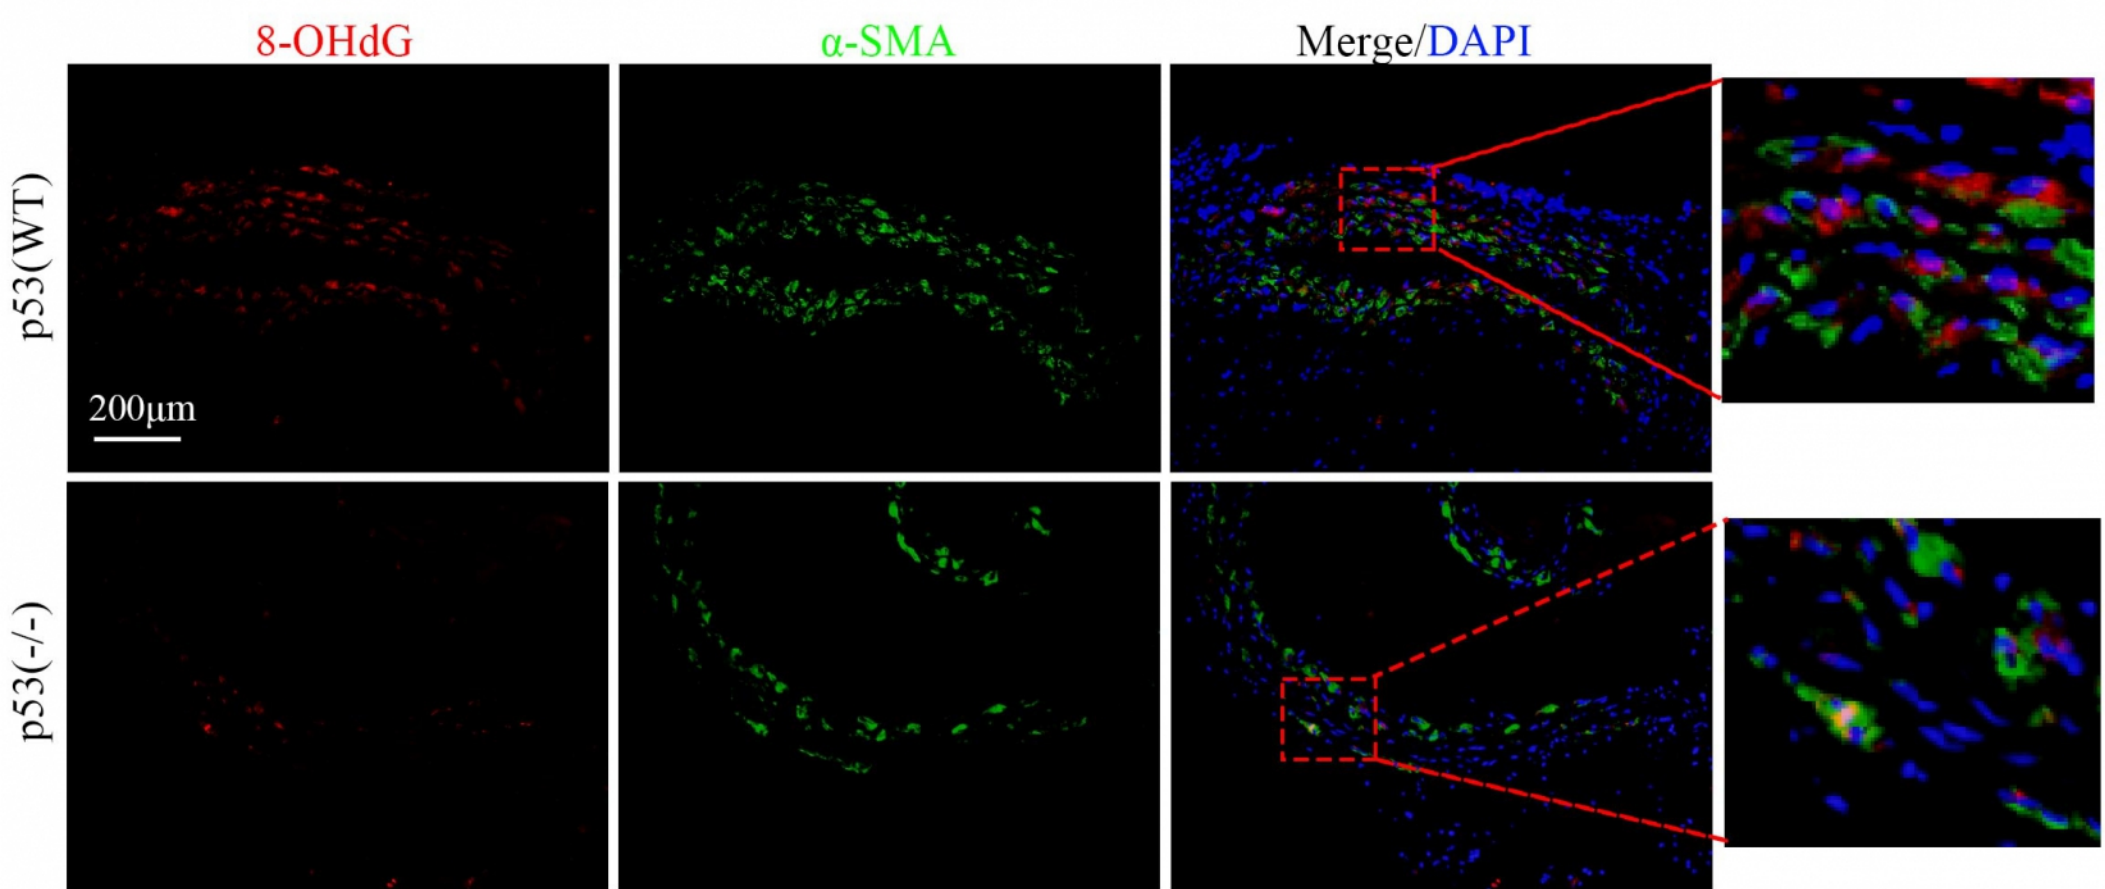

Figure S3
